# Supplementary material for: Well Self-Regulated People Use Mental Contrasting
Source: Atypon-hosted journal article supplement (doi:10.1027/1864-9335/a000322), 2017-11-01
Supplement: 1864-9335_a000322_esm1.pdf [file 1864-9335_a000322_esm1.pdf]

## Fragebogen

### 1 Mental Contrasting 1

Welcher persönliche Wunsch, bei dem es um das Erbringen einer akademischen Leistung geht, beschäftigt Sie zur Zeit am meisten?

Bitte schreiben Sie Ihren Wunsch in das unten stehende Feld.

### 2 Mental Contrasting 2

Für wie wahrscheinlich halten Sie es, dass Sie ihren Wunsch realisieren werden?

Bitte benutzen Sie den Mauszeiger, um eine Antwort auszuwählen.

- 1 gar nicht wahrscheinlich
  2
  3
  4
  5
  6
  7 sehr wahrscheinlich

Wie wichtig ist es Ihnen, dass Sie ihren Wunsch realisieren werden?

- 1 gar nicht wichtig
  2
  3
  4
  5
  6
  7 sehr wichtig

Wie schwierig, denken Sie, wird es, Ihren Wunsch zu realisieren?

- 1 gar nicht schwierig
  2
  3
  4
  5
  6
  7 sehr schwierig

### 3 Mental Contrasting 3

Auf der folgenden Seite werden wir Sie bitten, einmal über Ihren Wunsch nachzudenken. Bitte nehmen Sie sich dafür etwas Zeit und konzentrieren Sie sich ganz auf Ihren Wunsch. Klicken Sie nun bitte auf "weiter".

### 4 Mental Contrasting 4

Bitte denken Sie nun einmal über Ihren leistungsbezogenen Wunsch nach. Sie können über alle Aspekte, die mit Ihrem Wunsch in Zusammenhang stehen, nachdenken, die Ihnen in den Sinn kommen. Lassen Sie die geistigen Bilder zu Ihrem Wunsch einfach kommen und stellen Sie sich die relevanten Ereignisse und Erlebnisse so lebhaft wie möglich vor. Scheuen Sie sich nicht, Ihren Gedanken freien Lauf zu lassen. Schreiben Sie, was Ihnen in den Sinn kommt, in das unten stehende Feld.

### 5 Energetisierung und Commitment

Wie enttäuscht wären Sie, wenn Sie Ihren Wunsch nicht realisieren würden?

- 1 gar nicht enttäuscht
  2
  3
  4
  5
  6
  7 sehr enttäuscht

Wie entschlossen sind Sie, Ihren Wunsch zu realisieren?

- 1 gar nicht entschlossen
  2
  3
  4
  5
  6
  7 sehr entschlossen

Wie stark werden Sie sich bemühen, um Ihren Wunsch zu realisieren?

- 1 gar nicht stark
  2
  3
  4
  5
  6
  7 sehr stark

Wie energievoll fühlen Sie sich jetzt in diesem Augenblick?

- 1 gar nicht energievoll
  2
  3
  4
  5
  6
  7 sehr energievoll

### 6 Promotion-Prevention Scale 1

Im Folgenden geht darum, wie Sie sich in der Regel verhalten. Bitte geben Sie an, inwiefern Sie die folgenden Aussagen für zutreffend halten. Menschen sind unterschiedlich - es gibt weder richtige noch falsche Antworten. Antworten Sie einfach spontan. Wichtig ist, dass Sie jede Aussage bearbeiten. Fragebogen mit unbewerteten Aussagen können nicht ausgewertet werden. Wählen Sie im Zweifelsfall diejenige Antwortmöglichkeit, die noch am ehesten auf Sie zutrifft.

Im Allgemeinen konzentriere ich mich darauf, negative Ereignisse zu vermeiden.

- 1 überhaupt nicht
  2
  3
  4
  5
  6
  7 voll und ganz

Ich mache mir Sorgen, meinen Verantwortungen und Pflichten nicht gerecht zu werden.

- 1 überhaupt nicht
  2
  3
  4
  5
  6
  7 voll und ganz

Ich stelle mir oft vor, wie ich meine Hoffnungen und Ziele erreichen werde.

- 1 überhaupt nicht
  2
  3
  4
  5
  6
  7 voll und ganz

Ich mache mir oft Sorgen darüber, was für ein Mensch ich in Zukunft vielleicht einmal sein werde.

- 1 überhaupt nicht
  2
  3
  4
  5
  6
  7 voll und ganz

Ich denke oft darüber nach, was für ein Mensch ich in Zukunft sein möchte.

1 überhaupt nicht  2  3  4  5  6  7 voll und ganz

**Üblicherweise konzentriere ich mich auf den Erfolg, den ich hoffentlich in der Zukunft erreichen werde.**

1 überhaupt nicht  2  3  4  5  6  7 voll und ganz

**Ich mache mir oft Sorgen, dass ich es nicht schaffen werde, meine Ziele zu verwirklichen.**

1 überhaupt nicht  2  3  4  5  6  7 voll und ganz

**Ich denke oft daran, wie ich Erfolg erreichen werde.**

1 überhaupt nicht  2  3  4  5  6  7 voll und ganz

**Ich stelle mir oft vor, wie ich schlimme Erfahrungen mache, von denen ich befürchte, dass sie in der Zukunft auf mich zukommen könnten.**

1 überhaupt nicht  2  3  4  5  6  7 voll und ganz

## 7 Prevention-Promotion Scale 2

**Ich denke oft darüber nach, wie ich Misserfolge in meinem Leben vermeiden kann.**

1 überhaupt nicht  2  3  4  5  6  7 voll und ganz

**Ich bin stärker darauf ausgerichtet, Verluste zu vermeiden als Gewinne zu erzielen.**

1 überhaupt nicht  2  3  4  5  6  7 voll und ganz

**Momentan ist mein wichtigstes Ziel im Studium bzw. im Beruf, meine Ambitionen zu erfüllen.**

1 überhaupt nicht  2  3  4  5  6  7 voll und ganz

**Momentan besteht mein wichtigstes Ziel im Studium bzw. Beruf darin, es zu vermeiden, in Prüfungen zu versagen.**

1 überhaupt nicht  2  3  4  5  6  7 voll und ganz

**Ich sehe mich selbst als jemanden, der hauptsächlich danach strebt, sein ideales Selbstbild zu erreichen - seine Hoffnungen, Wünsche und Ziele.**

1 überhaupt nicht  2  3  4  5  6  7 voll und ganz

**Ich sehe mich selbst als jemanden, der hauptsächlich danach strebt, die an ihn gestellten Erwartungen zu erfüllen - den Aufgaben, Verantwortungen und Verpflichtungen gerecht zu werden.**

1 überhaupt nicht  2  3  4  5  6  7 voll und ganz

**Im Allgemeinen bin ich darauf konzentriert, positive Ergebnisse in meinem Leben zu erreichen.**

1 überhaupt nicht  2  3  4  5  6  7 voll und ganz

**Ich stelle mir oft vor, wie ich schöne Erfahrungen mache, von denen ich hoffe, dass sie in der Zukunft auf mich zukommen.**

1 überhaupt nicht  2  3  4  5  6  7 voll und ganz

**Im Großen und Ganzen bin ich stärker darauf ausgerichtet, Gewinne zu erzielen als Verluste zu vermeiden.**

1 überhaupt nicht  2  3  4  5  6  7 voll und ganz

## 8 LMI-K 1

Auf den folgenden Seiten finden Sie eine Reihe von Aussagen, wie man sie zum Beispiel bei einer Selbstbeschreibung machen würde. Bitte lesen Sie jede Aussage durch und geben Sie an, inwieweit sie auf Sie persönlich zutrifft.

**Ich habe mir vorgenommen, es beruflich weit zu bringen.**

1 trifft gar nicht zu  2  3  4  5  6  7 trifft vollständig zu

**Ich bin überzeugt davon, dass ich es beruflich zu etwas bringen werde.**

1 trifft gar nicht zu  2  3  4  5  6  7 trifft vollständig zu

**Mir sind Aufgaben lieber, die mir leicht von der Hand gehen, als solche, bei denen ich mich sehr einsetzen muss.**

1 trifft gar nicht zu  2  3  4  5  6  7 trifft vollständig zu

**Ich bin überzeugt, mich bisher in Studium, Ausbildung oder Beruf mehr engagiert zu haben als meine Kollegen.**

1 trifft gar nicht zu  2  3  4  5  6  7 trifft vollständig zu

**Ich empfinde Befriedigung darüber, meine eigene Leistung zu steigern.**

1 trifft gar nicht zu  2  3  4  5  6  7 trifft vollständig zu

**Aufgaben, bei denen ich nicht ganz sicher bin, ob ich sie lösen kann, reizen mich ganz besonders.**

1 trifft gar nicht zu  2  3  4  5  6  7 trifft vollständig zu

**Es ist mir sehr wichtig, eine verantwortungsvolle Position zu erreichen.**

1 trifft gar nicht zu  2  3  4  5  6  7 trifft vollständig zu

**Wenn ich eine Prüfung ablege, bin ich auch davon überzeugt, dass ich sie bestehe.**

1 trifft gar nicht zu  2  3  4  5  6  7 trifft vollständig zu

**Mein Ehrgeiz ist leicht herauszufordern.**

1 trifft gar nicht zu  2  3  4  5  6  7 trifft vollständig zu

**Ich beschäftige mich besonders gern mit Problemen, bei denen es eine harte Nuss zu knacken gibt.**

1 trifft gar nicht zu  2  3  4  5  6  7 trifft vollständig zu

**9 LMI-K 2**

**Ich bin zuversichtlich, dass meine Leistung die Anerkennung anderer finden wird.**

- 1 trifft gar nicht zu  2  3  4  5  6  7 trifft vollständig zu

**Ich suche mir gern Aufgaben, an denen ich meine Fähigkeiten prüfen kann.**

- 1 trifft gar nicht zu  2  3  4  5  6  7 trifft vollständig zu

**Am glücklichsten bin ich mit einer Aufgabe, bei der ich alle meine Kräfte einsetzen kann.**

- 1 trifft gar nicht zu  2  3  4  5  6  7 trifft vollständig zu

**Wenn mir etwas nicht so gut gelungen ist, wie ich es mir vorgenommen habe, strengere ich mich anschließend noch mehr an.**

- 1 trifft gar nicht zu  2  3  4  5  6  7 trifft vollständig zu

**Der Wunsch, besser zu sein als andere, ist ein großer Ansporn für mich.**

- 1 trifft gar nicht zu  2  3  4  5  6  7 trifft vollständig zu

**Schwierige Probleme reizen mich mehr als einfache.**

- 1 trifft gar nicht zu  2  3  4  5  6  7 trifft vollständig zu

**Auch wenn ich vor schwierigen Aufgaben stehe, bin ich immer guten Mutes.**

- 1 trifft gar nicht zu  2  3  4  5  6  7 trifft vollständig zu

**Wenn ich mit anderen zusammenarbeite, übernehme ich gewöhnlich die Initiative.**

- 1 trifft gar nicht zu  2  3  4  5  6  7 trifft vollständig zu

**Meine Bekannten würden es als typisch für mich ansehen, dass ich mich durch alle Schwierigkeiten durchbeiß.**

- 1 trifft gar nicht zu  2  3  4  5  6  7 trifft vollständig zu

**Ich empfinde Befriedigung über intensive, konzentrierte Arbeit.**

- 1 trifft gar nicht zu  2  3  4  5  6  7 trifft vollständig zu

**10 LMI-K 3**

**Ich arbeite gern an Aufgaben, die ein hohes Maß an Geschick erfordern.**

- 1 trifft gar nicht zu  2  3  4  5  6  7 trifft vollständig zu

**Es bereitet mir Freude, mich ganz in eine Aufgabe zu vertiefen.**

- 1 trifft gar nicht zu  2  3  4  5  6  7 trifft vollständig zu

**Es ist für mich ein beruflicher Ansporn, einmal eine wichtige Stellung zu erreichen.**

- 1 trifft gar nicht zu  2  3  4  5  6  7 trifft vollständig zu

**Ich glaube, dass ich mich an der Universität bzw. beruflich mehr anstrengere als die meisten meiner Kollegen.**

- 1 trifft gar nicht zu  2  3  4  5  6  7 trifft vollständig zu

**Wenn ich mit anderen zusammenarbeite, nehme ich die Sachen gern selbst in die Hand.**

- 1 trifft gar nicht zu  2  3  4  5  6  7 trifft vollständig zu

**Ich eigne mir lieber neue Kenntnisse an, als mich mit Dingen zu beschäftigen, die ich schon beherrsche.**

- 1 trifft gar nicht zu  2  3  4  5  6  7 trifft vollständig zu

**Wenn ich etwas erreicht habe, lag das vor allem an meinem Geschick und meinen Fähigkeiten.**

- 1 trifft gar nicht zu  2  3  4  5  6  7 trifft vollständig zu

**Durch eine schwierige Aufgabe fühle ich mich besonders herausgefordert.**

- 1 trifft gar nicht zu  2  3  4  5  6  7 trifft vollständig zu

**Wenn ein Risiko besteht, eine Aufgabe nicht zu schaffen, gebe ich mir ganz besondere Mühe.**

- 1 trifft gar nicht zu  2  3  4  5  6  7 trifft vollständig zu

**Es ist mir wichtig, meine Tüchtigkeit zu steigern.**

- 1 trifft gar nicht zu  2  3  4  5  6  7 trifft vollständig zu

**11 PRF Leistungsmotivation 1**

Lesen Sie sich jeden dieser Sätze durch und überlegen Sie, ob er auf Sie zutrifft oder nicht. Geben Sie zu jedem Satz entweder "Richtig" oder "Falsch" als Antwort; wenn Sie sich nicht ganz sicher sind, kreuzen Sie bitte die Antwort an, die am ehesten auf Sie zutrifft.

**Ich ärgere mich über mich selbst, wenn ich etwas nicht gründlich gelernt habe.**

- Richtig  Falsch

**Ich arbeite, weil ich arbeiten muss, und nur deswegen.**

- Richtig  Falsch

**Ich arbeite an Problemen weiter, bei denen andere schon aufgegeben haben.**

- Richtig  Falsch

**Ich versuche, nur so viel zu arbeiten, dass ich mein Auskommen habe.**

- Richtig  Falsch

**Ich setze mir oft schwer erreichbare Ziele.**

- Richtig  Falsch

**Ich würde lieber eine leichtere Arbeit ausführen als eine, bei der Schwierigkeiten zu überwinden sind.**

- Richtig  Falsch

**Ich habe mir vorgenommen, wenigstens etwas mehr zu leisten als irgend jemand vor mir.**

- Richtig  Falsch

**Harte Arbeit gefällt mir nicht.**

- Richtig  Falsch

## 12 PRF Leistungsmotivation 2

**Ich werde lieber nach Arbeitsleistung als nach Arbeitszeit bezahlt.**

- Richtig  Falsch

**Im Rahmen meines Berufes habe ich für meine Fortbildung selten zusätzliche Arbeit aufgewendet.**

- Richtig  Falsch

**Es macht mir nichts aus, zu arbeiten, während andere Leute sich amüsieren.**

- Richtig  Falsch

**Es ist mir an sich ziemlich gleichgültig, ob ich einer der Besten in meinem Arbeitsgebiet werde.**

- Richtig  Falsch

**Manchmal sagt man mir nach, ich vernachlässige andere wichtige Seiten meines Lebens, weil ich so viel arbeite.**

- Richtig  Falsch

**Sicherlich denken die Leute, dass ich nicht viel Energie habe.**

- Richtig  Falsch

**Ich arbeite lieber, als dass ich spiele.**

- Richtig  Falsch

**Wenn niemand zu sehen bekommt, was ich mache, tue ich oft nicht mein Bestes.**

- Richtig  Falsch

## 13 HAKEMP-90 1

**Bitte kreuzen Sie zu jeder Frage immer diejenige der beiden Antwortmöglichkeiten (a oder b) auf dem Antwortbogen an, die für Sie eher zutrifft.**

Wenn ich etwas Wertvolles verloren habe und jede Suche vergeblich war, dann

- a) kann ich mich schlecht auf etwas anderes konzentrieren  
 b) denke ich nicht mehr lange darüber nach

Wenn ich weiß, dass etwas bald erledigt werden muß, dann

- a) muß ich mir oft einen Ruck geben, um den Anfang zu kriegen  
 b) fällt es mir leicht, es schnell hinter mich zu bringen

Wenn ich ein neues, interessantes Spiel gelernt habe, dann

- a) habe ich bald auch wieder genug davon und tue etwas anderes  
 b) bleibe ich lange in das Spiel vertieft

Wenn ich vier Wochen lang an einer Sache gearbeitet habe und dann doch alles misslungen ist, dann

- a) dauert es lange, bis ich mich damit abfinde  
 b) denke ich nicht mehr lange darüber nach

Wenn ich nichts besonderes vorhabe und Lageweile habe, dann

- a) kann ich mich manchmal nicht entscheiden, was ich tun soll  
 b) habe ich meist rasch eine neue Beschäftigung

Wenn ich für etwas mir Wichtiges arbeite, dann

- a) unterbreche ich gern zwischendurch, um etwas anderes zu tun  
 b) gehe ich so in der Arbeit auf, daß ich lange Zeit dabei bleibe

Wenn ich bei einem Wettkampf öfter hintereinander verloren habe, dann

- a) denke ich bald nicht mehr daran  
 b) geht mir das noch eine ganze Weile durch den Kopf

Wenn ich ein schwieriges Problem angehen will, dann

- a) kommt mir die Sache vorher wie ein Berg vor  
 b) überlege ich, wie ich die Sache auf eine einigermaßen angenehme Weise hinter mich bringen kann

## 14 HAKEMP-90 2

Wenn ich einen interessanten Film sehe, dann

- a) bin ich meist so vertieft, dass ich gar nicht mehr auf den Gedanken komme, zu unterbrechen  
 b) habe ich zwischendurch trotzdem manchmal Lust, zu unterbrechen und etwas anderes zu machen

Wenn mir ein neues Gerät versehentlich auf den Boden gefallen und nicht mehr zu reparieren ist, dann

- a) finde ich mich rasch mit der Sache ab  
 b) komme ich nicht so schnell darüber hinweg

Wenn ich ein schwieriges Problem lösen muss, dann

- a) lege ich meist sofort los  
 b) gehen mir zunächst andere Dinge durch den Kopf, bevor ich mich richtig an die Sache heranmache

Wenn ich mich lange Zeit mit einer interessanten Sache beschäftige, dann

- a) denke ich manchmal darüber nach, ob diese Beschäftigung auch wirklich nützlich ist  
 b) gehe ich meist so in der Sache auf, dass ich gar nicht daran denke, wie sinnvoll sie ist

Wenn ich jemanden, mit dem ich etwas Wichtiges besprechen muß, wiederholt nicht zu Hause antreffe, dann

- a) geht mir das oft durch den Kopf, auch wenn ich mich schon mit etwas anderem beschäftige
- b) blende ich das aus, bis die nächste Gelegenheit kommt, ihn zu treffen

Wenn ich vor der Frage stehe, was ich in einigen freien Stunden tun soll, dann

- a) überlege ich manchmal eine Weile, bis ich mich entscheiden kann
- b) entscheide ich mich meist ohne Schwierigkeiten für eine der möglichen Beschäftigungen

Wenn ich einen interessanten Artikel in der Zeitung lese, dann

- a) bin ich meist sehr in das Lesen vertieft und lese den Artikel zu Ende
- b) wechsele ich trotzdem oft zu einem anderen Artikel, bevor ich ihn ganz gelesen habe

Wenn ich nach einem Einkauf zu Hause merke, dass ich zu viel bezahlt habe, aber das Geld nicht mehr zurück bekomme,

- a) fällt es mir schwer, mich auf irgendetwas anderes zu konzentrieren
- b) fällt es mir leicht, die Sache auszublenden

Wenn ich eigentlich zu Hause arbeiten müsste, dann

- a) fällt es mir oft schwer, mich an die Arbeit zu machen
- b) fange ich meist ohne weiteres an

Auf einer Urlaubsreise, die mir recht gut gefällt

- a) habe ich nach einiger Zeit Lust, etwas ganz anderes zu machen
- b) kommt mir bis zum Schluß nicht der Gedanke, etwas anderes zu machen

---

## 15 HAKEMP-90 3

Wenn meine Arbeit als völlig unzureichend bezeichnet wird, dann

- a) lasse ich mich davon nicht lange beirren
- b) bin ich zuerst wie gelähmt

Wenn ich sehr viele wichtige Dinge zu erledigen habe, dann

- a) überlege ich oft, wo ich anfangen soll
- b) fällt es mir leicht, einen Plan zu machen und ihn auszuführen

Wenn ich mit einem Nachbarn über ein interessantes Thema rede, dann

- a) entwickelt sich leicht ein ausgedehntes Gespräch
- b) habe ich bald wieder Lust, etwas anderes zu tun

Wenn ich mich verfare (z.B. mit dem Auto, mit dem Bus usw.) und eine wichtige Verabredung verpasse, dann

- a) kann ich mich zuerst schlecht auffaffen, irgendetwas anderes anzupacken
- b) lasse ich die Sache erst mal auf sich beruhen und wende mich ohne Schwierigkeiten anderen Dingen zu

Wenn ich zu zwei Dingen große Lust habe, die ich aber nicht beide machen kann, dann

- a) beginne ich schnell mit einer Sache und denke gar nicht mehr an die andere
- b) fällt es mir nicht so leicht, von einer der beiden Sachen ganz Abstand zu nehmen

Wenn ich mit einer interessanten Arbeit beschäftigt bin, dann

- a) suche ich mir zwischendurch gern eine andere Arbeit
- b) könnte ich unentwegt weitermachen

Wenn mir etwas ganz Wichtiges immer wieder nicht gelingen will, dann

- a) verliere ich allmählich den Mut
- b) vergesse ich es zunächst einmal und beschäftige mich mit anderen Dingen

Wenn ich etwas Wichtiges, aber unangenehmes zu erledigen habe, dann

- a) lege ich meist sofort los
- b) kann es eine Weile dauern, bis ich mich dazu auffaffe

Wenn ich mich auf einer Party mit jemandem über ein interessantes Thema unterhalte, dann

- a) kann ich mich für eine lange Zeit in das Thema vertiefen
- b) wechsele ich nach einiger Zeit gern zu einem anderen Thema

---

## 16 HAKEMP-90 4

Wenn mich etwas richtig traurig macht, dann

- a) fällt es mir schwer, irgendetwas anderes zu tun
- b) fällt es mir leicht, mich durch andere Dinge abzulenken

Wenn ich vorhabe, eine umfassende Arbeit zu erledigen, dann

- a) denke ich manchmal zu lange nach, womit ich anfangen soll
- b) habe ich keine Probleme loszulegen

Wenn ich bei einem Spiel viel besser abgeschnitten habe als die übrigen Spieler, dann

- a) habe ich Lust mit dem Spiel aufzuhören
- b) möchte ich am liebsten gleich weiterspielen

Wenn einmal sehr viele Dinge am selben Tag misslingen, dann

- a) weiß ich manchmal nichts mit mir anzufangen
- b) bleibe ich fast genauso tatkräftig, als wäre nichts passiert

Wenn ich vor einer langweiligen Aufgabe stehe, dann

- a) habe ich meist keine Probleme, mich an die Arbeit zu machen
- b) bin ich manchmal wie gelähmt

Wenn ich etwas Interessantes lese, dann

- a) beschäftige ich mich zwischendurch zur Abwechslung auch mit anderen Dingen
- b) bleibe ich oft sehr lange dabei

Wenn ich meinen ganzen Ehrgeiz darin gesetzt habe, eine bestimmte Arbeit gut zu verrichten und es geht schief, dann

- a) kann ich die Sache auf sich beruhen lassen und mich anderen Dingen zuwenden
- b) fällt es mir schwer, überhaupt noch etwas zu tun

Wenn ich unbedingt einer lästigen Pflicht nachgehen muss, dann

- a) bringe ich die Sache ohne Schwierigkeiten hinter mich
- b) fällt es mir schwer, damit anzufangen

Wenn ich versuche, etwas neues zu lernen, das mich sehr interessiert, dann

- a) vertiefe ich mich für lange Zeit in diese Sache
- b) unterbreche ich gern nach einiger Zeit, um mich anderen Dingen zuzuwenden

---

## 17 Demografische Fragen & Hypothesen

Sie haben es fast geschafft! Wir haben noch ein paar kurze demografische Fragen an Sie.

**Welches Geschlecht haben Sie?**

- weiblich
- männlich

**Wie alt sind Sie?**

**Was studieren Sie bzw. welchen Beruf üben Sie aus?**

**Falls Sie studieren: In welchem Semester sind Sie?**

**Was ist Ihr höchster Abschluss?**

Haupt-/Realschulabschluss  
Abitur  
Fachhochschulabschluss  
Bachelor/Vordiplom/Grundstudium  
Universitätsabschluss (Master/Magister/Diplom)  
Höherer akademischer Grad (Dr./Prof.)

**Falls Abitur: Welche Abiturnote haben Sie erreicht?**

**Falls Sie studieren: Was ist Ihre aktuelle Durchschnittsnote?**

Falls Sie Ihr Studium schon beendet haben, geben Sie bitte Ihre Abschlussnote an.

**Können Sie sich denken, was die Hypothesen des Experimentes sind?**

Wenn ja, schreiben Sie bitte ihre Gedanken in das Feld.

**Kam Ihnen irgendetwas bekannt vor oder ist Ihnen etwas aufgefallen?**

**Haben Sie, als Sie über Ihren Wunsch nachgedacht haben, eine bestimmte Technik oder Strategie angewendet? Falls ja: Welche?**

---

## 18 Endseite
