# Supplementary material for: Well Self-Regulated People Use Mental Contrasting
Source: Atypon-hosted journal article supplement (doi:10.1027/1864-9335/a000322), 2017-11-01
Supplement: 1864-9335_a000322_esm2.pdf [file 1864-9335_a000322_esm2.pdf]

## Fragebogen

### 1 Anliegen

Welches Anliegen, bei dem es um das Erbringen einer Leistung geht (z.B. eine Prüfung bestehen, eine Examensarbeit schreiben), beschäftigt Sie zur Zeit am meisten?

Bitte schreiben Sie Ihr Anliegen in das unten stehende Feld

### 2 Erwartung, Anreiz, Schwierigkeit

Für wie wahrscheinlich halten Sie es, dass Ihr Anliegen in Erfüllung geht?

Bitte benutzen Sie den Mauszeiger, um eine Antwort auszuwählen

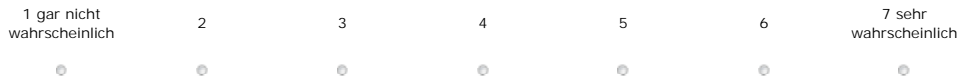

Wie wichtig ist es Ihnen, dass Ihr Anliegen in Erfüllung geht?

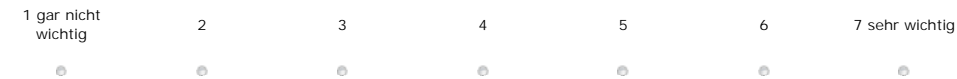

Wie schwierig, denken Sie, wird es Ihr Anliegen in Erfüllung zu bringen?

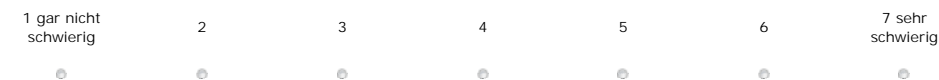

### 3 Freies Nachdenken

Bitte denken Sie einmal über Ihr Anliegen nach. Sie können über alle Aspekte, die mit ihrem Anliegen in Zusammenhang stehen, nachdenken, die Ihnen in den Sinn kommen. Lassen Sie die geistigen Bilder zu Ihrem Anliegen einfach kommen und stellen Sie sich die relevanten Ereignisse und Erlebnisse so lebhaft wie möglich vor. Scheuen Sie sich nicht, Ihren Gedanken freien Lauf zu lassen.

Schreiben Sie, was Ihnen in den Sinn kommt, in das unten stehende Feld

### 4 Zielbindung

Wie enttäuscht wären Sie, wenn Ihr Anliegen nicht in Erfüllung gehen würde?

Bitte benutzen Sie den Mauszeiger, um eine Antwort auszuwählen

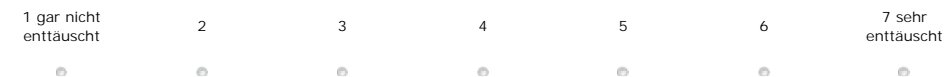

Wie entschlossen sind Sie, Ihr Anliegen zu erreichen?

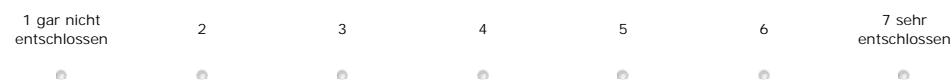

Wie nahe fühlen Sie sich an der Initiierung einer Handlung, die zur Erfüllung ihres Anliegens beiträgt?

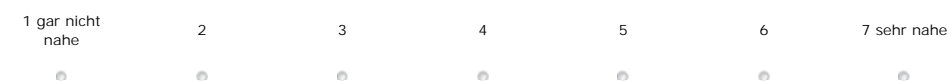

Wie schlimm wäre es für Sie, wenn Ihr Anliegen nicht in Erfüllung gehen würde?

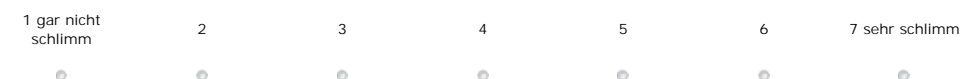

Wie stark werden Sie sich bemühen, um Ihr Anliegen zu erreichen?

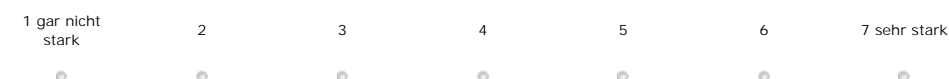

Wie sehr würden Sie die Initiative ergreifen, um Ihr Anliegen in Erfüllung zu bringen?

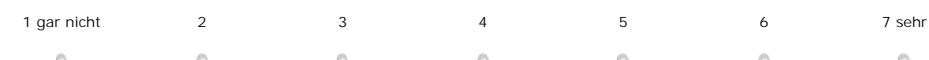

Wie energievoll fühlen Sie sich jetzt in diesem Augenblick?

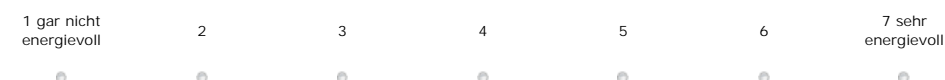

### 5 Need for Cognition

Im Folgenden bitten wir Sie, einige Fragen in Bezug auf Sich selbst zu beantworten

Bitte geben Sie auf der Skala an, inwieweit die folgenden Aussagen auf Sie zutreffen.

|                                                                                                                                                                                      | -3 völlig<br>unzutreffend | -2                    | -1                    | 0                     | 1                     | 2                     | 3 trifft voll<br>und ganz<br>zu |
|--------------------------------------------------------------------------------------------------------------------------------------------------------------------------------------|---------------------------|-----------------------|-----------------------|-----------------------|-----------------------|-----------------------|---------------------------------|
| Die Aufgabe, neue Lösungen für Probleme zu finden, macht mir wirklich Spass.                                                                                                         | <input type="radio"/>     | <input type="radio"/> | <input type="radio"/> | <input type="radio"/> | <input type="radio"/> | <input type="radio"/> | <input type="radio"/>           |
| Ich würde lieber eine Aufgabe lösen, die Intelligenz erfordert, schwierig und bedeutend ist, als eine Aufgabe, die zwar irgendwie wichtig ist, aber nicht viel Nachdenken erfordert. | <input type="radio"/>     | <input type="radio"/> | <input type="radio"/> | <input type="radio"/> | <input type="radio"/> | <input type="radio"/> | <input type="radio"/>           |
| Ich setze mir eher solche Ziele, die nur mit erheblicher geistiger Anstrengung erreicht werden können.                                                                               | <input type="radio"/>     | <input type="radio"/> | <input type="radio"/> | <input type="radio"/> | <input type="radio"/> | <input type="radio"/> | <input type="radio"/>           |
| Die Vorstellung, mich auf mein Denkvermögen zu verlassen, um es zu etwas zu bringen, spricht mich nicht an.                                                                          | <input type="radio"/>     | <input type="radio"/> | <input type="radio"/> | <input type="radio"/> | <input type="radio"/> | <input type="radio"/> | <input type="radio"/>           |
| Ich finde es besonders befriedigend, eine bedeutende Aufgabe abzuschließen, die viel Denken und geistige Anstrengung erfordert hat.                                                  | <input type="radio"/>     | <input type="radio"/> | <input type="radio"/> | <input type="radio"/> | <input type="radio"/> | <input type="radio"/> | <input type="radio"/>           |
| Ich denke lieber über kleine, alltägliche Vorhaben nach, als über langfristige.                                                                                                      | <input type="radio"/>     | <input type="radio"/> | <input type="radio"/> | <input type="radio"/> | <input type="radio"/> | <input type="radio"/> | <input type="radio"/>           |
| Ich würde lieber etwas tun, das wenig Denken erfordert, als etwas, das mit Sicherheit meine Denkfähigkeit herausfordert.                                                             | <input type="radio"/>     | <input type="radio"/> | <input type="radio"/> | <input type="radio"/> | <input type="radio"/> | <input type="radio"/> | <input type="radio"/>           |
| Ich finde wenig Befriedigung darin, angestrengt und stundenlang nachzudenken.                                                                                                        | <input type="radio"/>     | <input type="radio"/> | <input type="radio"/> | <input type="radio"/> | <input type="radio"/> | <input type="radio"/> | <input type="radio"/>           |
| In erster Linie denke ich, weil ich muss.                                                                                                                                            | <input type="radio"/>     | <input type="radio"/> | <input type="radio"/> | <input type="radio"/> | <input type="radio"/> | <input type="radio"/> | <input type="radio"/>           |
| Ich trage nicht gerne die Verantwortung für eine Situation, die sehr viel Denken erfordert.                                                                                          | <input type="radio"/>     | <input type="radio"/> | <input type="radio"/> | <input type="radio"/> | <input type="radio"/> | <input type="radio"/> | <input type="radio"/>           |
| Denken entspricht nicht dem, was ich unter Spass verstehe.                                                                                                                           | <input type="radio"/>     | <input type="radio"/> | <input type="radio"/> | <input type="radio"/> | <input type="radio"/> | <input type="radio"/> | <input type="radio"/>           |
| Ich versuche, Situationen vorauszuahnen und zu vermeiden, in denen die Wahrscheinlichkeit groß ist, dass ich intensiv über etwas nachdenken muss.                                    | <input type="radio"/>     | <input type="radio"/> | <input type="radio"/> | <input type="radio"/> | <input type="radio"/> | <input type="radio"/> | <input type="radio"/>           |
| Ich habe es gern, wenn mein Leben voller kniffliger Aufgaben ist, die ich lösen muss.                                                                                                | <input type="radio"/>     | <input type="radio"/> | <input type="radio"/> | <input type="radio"/> | <input type="radio"/> | <input type="radio"/> | <input type="radio"/>           |
| Ich würde komplizierte Probleme einfachen Problemen vorziehen.                                                                                                                       | <input type="radio"/>     | <input type="radio"/> | <input type="radio"/> | <input type="radio"/> | <input type="radio"/> | <input type="radio"/> | <input type="radio"/>           |
| Es genügt mir, einfach die Antwort zu kennen, ohne die Gründe für die Antwort eines Problems zu verstehen.                                                                           | <input type="radio"/>     | <input type="radio"/> | <input type="radio"/> | <input type="radio"/> | <input type="radio"/> | <input type="radio"/> | <input type="radio"/>           |
| Es genügt, dass etwas funktioniert, mir ist es egal, wie oder warum.                                                                                                                 | <input type="radio"/>     | <input type="radio"/> | <input type="radio"/> | <input type="radio"/> | <input type="radio"/> | <input type="radio"/> | <input type="radio"/>           |

## 6 Brief Self Control Scale

Wie schätzen Sie Sich ein?

|                                                                                    | stimmt nicht          | stimmt kaum           | teils/teils           | stimmt eher           | stimmt genau          |
|------------------------------------------------------------------------------------|-----------------------|-----------------------|-----------------------|-----------------------|-----------------------|
| Ich kann Versuchungen gut widerstehen.                                             | <input type="radio"/> |
| Schlechte Angewohnheiten kann ich mir nur schwer abgewöhnen.                       | <input type="radio"/> |
| Ich bin fleißig.                                                                   | <input type="radio"/> |
| Ich sage Dinge, die unangebracht sind.                                             | <input type="radio"/> |
| Ich tue Dinge, die Spaß machen, auch wenn sie schlecht für mich sind.              | <input type="radio"/> |
| Ich lehne Dinge ab, die schlecht für mich sind.                                    | <input type="radio"/> |
| Ich wünschte, ich hätte mehr Selbstdisziplin.                                      | <input type="radio"/> |
| Andere würden sagen, dass ich eine eiserne Disziplin habe.                         | <input type="radio"/> |
| Vergnügen und Spass halten mich nicht davon ab, meine Arbeit zu erledigen.         | <input type="radio"/> |
| Es fällt mir schwer, mich zu konzentrieren.                                        | <input type="radio"/> |
| Ich kann erfolgreich auf langfristige Ziele hinarbeiten.                           | <input type="radio"/> |
| Bestimmte Dinge kann ich nicht sein lassen, obwohl ich weiß, dass sie falsch sind. | <input type="radio"/> |
| Manchmal handle ich, ohne alle Alternativen abzuwägen.                             | <input type="radio"/> |

## 7 NEO-FFI

Auf den folgenden Seiten finden Sie einige Aussagen, welche sich zur Beschreibung Ihrer eigenen Person eignen könnten. Bitte geben Sie auf der Skala an, inwieweit jede Aussage auf Sie zutrifft oder nicht

starke Ablehnung      Ablehnung      neutral      zustimmung      starke Zustimmung

|                                                                                                    |                       |                       |                       |                       |                       |
|----------------------------------------------------------------------------------------------------|-----------------------|-----------------------|-----------------------|-----------------------|-----------------------|
| Ich habe gerne viele Leute um mich herum.                                                          | <input type="radio"/> |
| Ich halte meine Sachen ordentlich und sauber.                                                      | <input type="radio"/> |
| Ich fühle mich anderen oft unterlegen.                                                             | <input type="radio"/> |
| Ich bin leicht zum Lachen zu bringen.                                                              | <input type="radio"/> |
| Ich finde philosophische Diskussionen langweilig.                                                  | <input type="radio"/> |
| Ich bekomme häufiger Streit mit meiner Familie und meinen Kollegen.                                | <input type="radio"/> |
| Ich kann mir meine Zeit recht gut einteilen, so dass ich meine Angelegenheiten rechtzeitig beende. | <input type="radio"/> |
| Wenn ich unter starkem Stress stehe, fühle ich mich manchmal, als ob ich zusammenbräche.           | <input type="radio"/> |
| Mich begeistern die Motive, die ich in der Kunst und in der Natur finde.                           | <input type="radio"/> |
| Manche Leute halten mich für selbstsüchtig und selbstgefällig                                      | <input type="radio"/> |

## 8 NEO-FFI

|                                                                                  | starke Ablehnung      | Ablehnung             | neutral               | zustimmung            | starke Zustimmung     |
|----------------------------------------------------------------------------------|-----------------------|-----------------------|-----------------------|-----------------------|-----------------------|
| Ich versuche, alle mir übertragenen Aufgaben sehr gewissenhaft zu erledigen.     | <input type="radio"/> |
| Ich fühle mich oft angespannt und nervös.                                        | <input type="radio"/> |
| Ich bin gerne im Zentrum des Geschehens.                                         | <input type="radio"/> |
| Poesie beeindruckt mich wenig oder gar nicht.                                    | <input type="radio"/> |
| Im Hinblick auf die Absichten anderer bin ich eher zynisch und skeptisch.        | <input type="radio"/> |
| Manchmal fühle ich mich völlig wertlos.                                          | <input type="radio"/> |
| Ich habe oft das Gefühl, vor Energie überzuschäumen.                             | <input type="radio"/> |
| Ich bin ein fröhlicher, gut gelaunter Mensch.                                    | <input type="radio"/> |
| Um zu bekommen, was ich will, bin ich notfalls bereit, Menschen zu manipulieren. | <input type="radio"/> |
| Zu häufig bin ich entmutigt und will aufgeben, wenn etwas schief geht.           | <input type="radio"/> |

## 9 NEO-FFI

|                                                                                                                            | starke Ablehnung      | Ablehnung             | neutral               | zustimmung            | starke Zustimmung     |
|----------------------------------------------------------------------------------------------------------------------------|-----------------------|-----------------------|-----------------------|-----------------------|-----------------------|
| Wenn ich Literatur lese oder ein Kunstwerk betrachte, empfinde ich manchmal ein Frösteln oder eine Welle der Begeisterung. | <input type="radio"/> |
| Ich habe wenig Interesse, über die Natur des Universums oder die Lage der Menschheit zu spekulieren.                       | <input type="radio"/> |
| Ich versuche, stets rücksichtsvoll und sensibel zu handeln.                                                                | <input type="radio"/> |
| Ich bin eine tüchtige Person, die ihre Arbeit immer erledigt.                                                              | <input type="radio"/> |
| Ich fühle mich oft hilflos und wünsche mir eine Person, die meine Probleme löst.                                           | <input type="radio"/> |
| Ich bin ein sehr aktiver Mensch.                                                                                           | <input type="radio"/> |
| Ich werde wohl niemals fähig sein, Ordnung in mein Leben zu bringen.                                                       | <input type="radio"/> |
| Ich habe oft Spass daran, mit Theorien oder abstrakten Ideen zu spielen.                                                   | <input type="radio"/> |
| Manche Leute halten mich für kalt und berechnend.                                                                          | <input type="radio"/> |
| Wenn ich eine Verpflichtung eingehe, so kann man sich auf mich bestimmt verlassen.                                         | <input type="radio"/> |

## 10 SRQ

Bitte geben Sie auf der Skala an, inwieweit Sie den folgenden Aussagen zustimmen oder nicht zustimmen.

|                                                                    | stimme überhaupt nicht zu | stimme eher nicht zu  | unsicher              | stimme eher zu        | stimme sehr zu        |
|--------------------------------------------------------------------|---------------------------|-----------------------|-----------------------|-----------------------|-----------------------|
| Es fällt mir schwer, Pläne zu machen und meine Ziele zu erreichen. | <input type="radio"/>     | <input type="radio"/> | <input type="radio"/> | <input type="radio"/> | <input type="radio"/> |
| Es fällt mir schwer, mir eigenständig Ziele zu setzen.             | <input type="radio"/>     | <input type="radio"/> | <input type="radio"/> | <input type="radio"/> | <input type="radio"/> |

|                                                                                              |                       |                       |                       |                       |                       |
|----------------------------------------------------------------------------------------------|-----------------------|-----------------------|-----------------------|-----------------------|-----------------------|
| Wenn ich einmal ein Ziel vor Augen habe, kann ich normalerweise planen, wie ich es erreiche. | <input type="radio"/> |
| Ich gebe schnell auf.                                                                        | <input type="radio"/> |
| Ich setze mir Ziele eigenständig und beobachte meinen Fortschritt bei deren Erreichung.      | <input type="radio"/> |
| Wenn ich versuche etwas zu verändern, achte ich darauf, wie ich es mache.                    | <input type="radio"/> |
| Ich bemerke die Folgen meiner Handlungen nicht, bis es zu spät ist.                          | <input type="radio"/> |
| Ich neige dazu, weiterzumachen wie gehabt, auch wenn es nicht funktioniert.                  | <input type="radio"/> |
| Ich habe persönliche Standards und versuche, nach ihnen zu leben.                            | <input type="radio"/> |
| Ich lasse mich leicht von meinen Plänen ablenken.                                            | <input type="radio"/> |

## 11 SRQ

|                                                                                  | stimme überhaupt nicht zu | stimme eher nicht zu  | unsicher              | stimme eher zu        | stimme sehr zu        |
|----------------------------------------------------------------------------------|---------------------------|-----------------------|-----------------------|-----------------------|-----------------------|
| Wenn ich mir etwas vorgenommen habe, fällt es mir oft schwer dranzubleiben.      | <input type="radio"/>     | <input type="radio"/> | <input type="radio"/> | <input type="radio"/> | <input type="radio"/> |
| Ich habe eine große Willenskraft.                                                | <input type="radio"/>     | <input type="radio"/> | <input type="radio"/> | <input type="radio"/> | <input type="radio"/> |
| Ich bin in der Lage, selbstgesetzte Ziele zu erreichen.                          | <input type="radio"/>     | <input type="radio"/> | <input type="radio"/> | <input type="radio"/> | <input type="radio"/> |
| Wenn ich mir vornehme etwas zu verändern, achte ich sehr darauf, wie ich es tue. | <input type="radio"/>     | <input type="radio"/> | <input type="radio"/> | <input type="radio"/> | <input type="radio"/> |
| Ich zögere Entscheidungen heraus.                                                | <input type="radio"/>     | <input type="radio"/> | <input type="radio"/> | <input type="radio"/> | <input type="radio"/> |
| Meistens schenke ich dem, was ich tue, keine Aufmerksamkeit.                     | <input type="radio"/>     | <input type="radio"/> | <input type="radio"/> | <input type="radio"/> | <input type="radio"/> |
| Ich scheine nicht aus meinen Fehlern zu lernen.                                  | <input type="radio"/>     | <input type="radio"/> | <input type="radio"/> | <input type="radio"/> | <input type="radio"/> |
| Ich bin zuversichtlich, dass ich mich ändern könnte, wenn ich wollte.            | <input type="radio"/>     | <input type="radio"/> | <input type="radio"/> | <input type="radio"/> | <input type="radio"/> |
| Ich behalte für gewöhnlich im Auge, inwieweit ich mich meinen Zielen nähere.     | <input type="radio"/>     | <input type="radio"/> | <input type="radio"/> | <input type="radio"/> | <input type="radio"/> |
| Normalerweise denke ich nach, bevor ich handle.                                  | <input type="radio"/>     | <input type="radio"/> | <input type="radio"/> | <input type="radio"/> | <input type="radio"/> |

## 12 SRQ

|                                                                                                        | stimme überhaupt nicht zu | stimme eher nicht zu  | unsicher              | stimme eher zu        | stimme sehr zu        |
|--------------------------------------------------------------------------------------------------------|---------------------------|-----------------------|-----------------------|-----------------------|-----------------------|
| Sobald ich ein Problem oder eine Herausforderung sehe, beginne ich, nach möglichen Lösungen zu suchen. | <input type="radio"/>     | <input type="radio"/> | <input type="radio"/> | <input type="radio"/> | <input type="radio"/> |
| Wenn ich über eine Veränderung entscheiden soll, fühle ich mich in der Wahl überfordert.               | <input type="radio"/>     | <input type="radio"/> | <input type="radio"/> | <input type="radio"/> | <input type="radio"/> |
| Ich lerne aus meinen Fehlern.                                                                          | <input type="radio"/>     | <input type="radio"/> | <input type="radio"/> | <input type="radio"/> | <input type="radio"/> |
| Ich kann Versuchungen widerstehen.                                                                     | <input type="radio"/>     | <input type="radio"/> | <input type="radio"/> | <input type="radio"/> | <input type="radio"/> |
| Ich bin mir dem, was ich tue, nicht bewusst, bis jemand meine Aufmerksamkeit darauf richtet.           | <input type="radio"/>     | <input type="radio"/> | <input type="radio"/> | <input type="radio"/> | <input type="radio"/> |
| Ich habe Schwierigkeiten mich zu entscheiden.                                                          | <input type="radio"/>     | <input type="radio"/> | <input type="radio"/> | <input type="radio"/> | <input type="radio"/> |
| Ich weiß, wie ich sein möchte.                                                                         | <input type="radio"/>     | <input type="radio"/> | <input type="radio"/> | <input type="radio"/> | <input type="radio"/> |
| Für gewöhnlich muss ich Fehler nur ein Mal machen, um daraus zu lernen.                                | <input type="radio"/>     | <input type="radio"/> | <input type="radio"/> | <input type="radio"/> | <input type="radio"/> |
| Ich kann an einem Plan festhalten, der gut funktioniert.                                               | <input type="radio"/>     | <input type="radio"/> | <input type="radio"/> | <input type="radio"/> | <input type="radio"/> |
| Wenn ich etwas verändern möchte, fallen mir normalerweise viele verschiedene Wege/Möglichkeiten ein.   | <input type="radio"/>     | <input type="radio"/> | <input type="radio"/> | <input type="radio"/> | <input type="radio"/> |
| Es fällt mir schwer, festzustellen, wann ich genug von etwas habe (Alkohol, Essen, Süßigkeiten)        | <input type="radio"/>     | <input type="radio"/> | <input type="radio"/> | <input type="radio"/> | <input type="radio"/> |

## 13 Demografische Fragen

Sie haben es fast geschafft! Am Schluss haben wir noch ein paar kurze demografische Fragen an Sie.

**Welches Geschlecht haben Sie?**

☐ weiblich ☐ männlich

**Wie alt sind Sie?**

**Sind Sie als Student an einer Hochschule eingeschrieben?**

☐ Ja ☐ Nein

---

Wenn ja, was studieren Sie im Hauptfach?

Wenn ja, an welcher Hochschule studieren Sie?

Wenn Sie kein Student sind, was ist Ihre Tätigkeit?

---

**14   Endseite**

---
